# Supplementary material for: Adipose triglyceride lipase acts on neutrophil lipid droplets to regulate substrate availability for lipid mediator synthesis
Source: PubMed Central journal article supplement (PMC4594763; doi:10.1189/jlb.3a0515-206r), 2015-06-24
Supplement: NIHMS64040-supplement-1.pdf [file NIHMS64040-supplement-1.pdf]

**Figure 1**

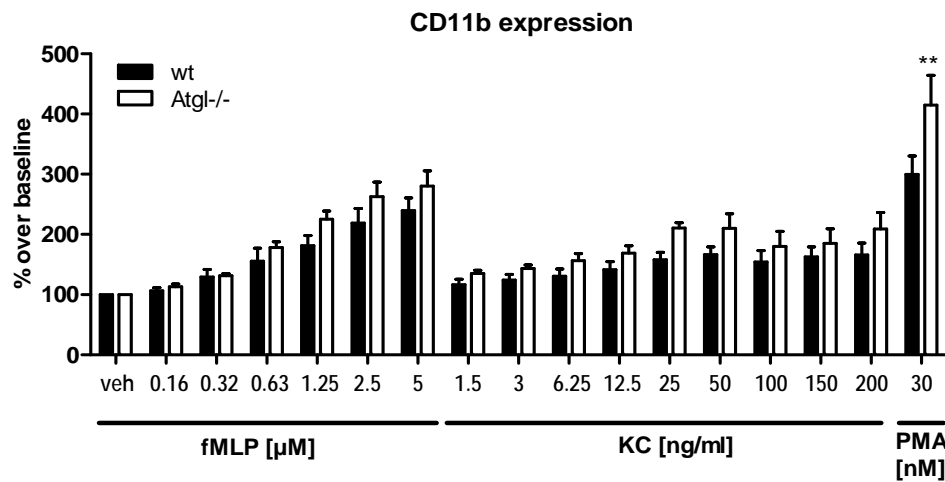

**Figure 1: Agonist-induced CD11b surface expression of wt and Atgl-/- neutrophils**

Isolated neutrophils were pre-incubated with anti-CD11b-Alexa Fluor647 (BD Biosciences, San Jose, CA) for 10 min at RT in the dark and then stimulated with various concentrations of formyl-methionyl-leucyl-phenylalanine (fMLP), keratinocyte-derived chemoattractant (KC) (PeproTech Inc., Rocky Hill, NJ) and phorbol myristate acetate (PMA) (Sigma-Aldrich, Steinheim, Germany), and for 30 min at 37°C. Cells were resuspended in Cellfix for analysis using a FACScalibur flow cytometer (BD Biosciences). Data are shown as -fold change relative to vehicle-treated control cells + SEM (n=6-12). \*\*p ≤ 0.01
