# Supplementary material for: Adipose triglyceride lipase acts on neutrophil lipid droplets to regulate substrate availability for lipid mediator synthesis
Source: PubMed Central journal article supplement (PMC4594763; doi:10.1189/jlb.3a0515-206r), 2015-06-24
Supplement: NIHMS64040-supplement-2.pdf [file NIHMS64040-supplement-2.pdf]

**Figure 2**

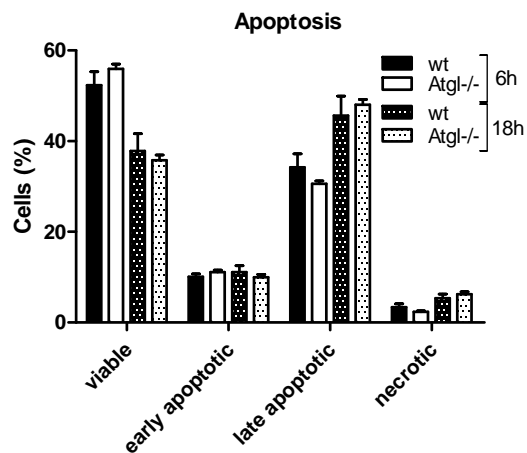

**Figure 2: Unchanged apoptosis between wt and Atgl-/- neutrophils**

Neutrophils from bone marrow were isolated by gradient centrifugation and cultured at a density of  $1 \times 10^7$  cells in culture medium containing 11 mM glucose for 6 and 18 h. Two hundred  $\mu$ l cells were stained with annexin V and propidium iodide (PI) according to manufacturer's protocols (Annexin V-FITC apoptosis detection kit I; BD Biosciences). Quantifications of the total amount of annexin V-positive (early apoptotic), annexin V/PI-positive (late apoptotic), and PI-positive (necrotic) cells are shown as means (n=5) + SEM.
