# Supplementary material for: Adipose triglyceride lipase acts on neutrophil lipid droplets to regulate substrate availability for lipid mediator synthesis
Source: PubMed Central journal article supplement (PMC4594763; doi:10.1189/jlb.3a0515-206r), 2015-06-24
Supplement: NIHMS64040-supplement-3.pdf [file NIHMS64040-supplement-3.pdf]

**Supplemental Table 1: Release of lipid mediators from peritoneal neutrophils**

Wt neutrophils from peritoneal lavages one day post thioglycolate injection were cultured in the absence or presence of Atglistatin. Media were collected from non-activated and activated cells (0.5  $\mu$ M A23187, 1 h). Data are shown as median (pg/ml) and range (n=6).

| Pathway     | Lipid mediator                   | Thioglycolate-stimulated |               |              |               | Thioglycolate +A23187-stimulated |               |              |               |
|-------------|----------------------------------|--------------------------|---------------|--------------|---------------|----------------------------------|---------------|--------------|---------------|
|             |                                  | -Atglistatin             |               | +Atglistatin |               | -Atglistatin                     |               | +Atglistatin |               |
|             |                                  | median                   | range         | median       | range         | median                           | range         | media        | range         |
| COX-AA      | 6-keto-PGF1a                     | 95                       | (29 - 467)    | 35*          | (12 - 211)    | 152                              | (22 - 634)    | 94           | (26 - 262)    |
| COX-EPA     | TxB3                             | 3681                     | (2820 - 3961) | 3159         | (3002 - 3521) | 2079                             | (1713 - 2525) | 3142         | (1940 - 3332) |
| COX-AA      | TxB2                             | 416                      | (170 - 527)   | 111*         | (79 - 145)    | 241                              | (79 - 357)    | 77*          | (61 - 99)     |
| COX-AA      | PGF2a                            | 116                      | (58 - 145)    | 70           | (54 - 74)     | 82                               | (65 - 105)    | 57           | (53 - 61)     |
| ROS, COX-AA | 15-keto-PGF2a/ 8-iso-PGE2/ PGE2  | 1184                     | (617 - 1524)  | 343*         | (252 - 434)   | 585                              | (319 - 1127)  | 230*         | (147 - 320)   |
| ROS, COX-AA | 8-iso-PGE2/ PGE2                 | 795                      | (364 - 1021)  | 190*         | (132 - 227)   | 423                              | (194 - 704)   | 108*         | (32 - 169)    |
| COX-AA      | PGD2                             | 140                      | (105 - 177)   | 72           | (65 - 73)     | 123                              | (77 - 201)    | n.d.         |               |
| COX-DHGLA   | PGD1                             | 56                       | (51 - 57)     | 45           | (44 - 45)     | 45                               | (44 - 51)     | n.d.         |               |
| COX, ROS-AA | 15-keto-PGE2/ 8-iso-15-keto PGE2 | 54                       | (49 - 59)     | 49*          | (46 - 52)     | 55                               | (50 - 61)     | 47*          | (46 - 52)     |
| LOX-AA      | LTE4                             | 30                       | (27 - 35)     | n.d.         |               | 99                               | (42 - 110)    | 33           | (22 - 65)     |
| COX-AA      | PGJ2                             | 20                       | (16 - 27)     | 15           | (14 - 17)     | 18                               | (14 - 24)     | n.d.         |               |
| LOX-AA      | 5(S).15(S)-DiHETE                | n.d.                     |               | n.d.         |               | 78                               | (56 - 81)     | 62*          | (57 - 68)     |
| LOX-AA      | LTB4                             | 138                      | (137 - 153)   | 131*         | (130 - 141)   | 971                              | (538 - 1252)  | 577*         | (351 - 858)   |
| LOX-AA      | 12-oxo-LTB4                      | n.d.                     |               | n.d.         |               | 195                              | (174 - 210)   | 172          | (165 - 173)   |
| LOX-AA      | Tetranor-12(S)-HETE              | 58                       | (57 - 58)     | 60           | (58 - 60)     | 58                               | (57 - 58)     | 58           | (58 - 58)     |
| COX-AA      | 12(S)-HHT                        | 541                      | (269 - 739)   | 136*         | (117 - 178)   | 311                              | (117 - 442)   | 104*         | (77 - 135)    |
| LOX-AA      | 5(S).6(S)-DiHETE                 | n.d.                     |               | n.d.         |               | 238                              | (185 - 284)   | 214          | (160 - 274)   |
| CYP-AA      | 5,6-DHET                         | 168                      | (167 - 168)   | 167          | (166 - 168)   | 167                              | (166 - 167)   | 167          | (166 - 168)   |
| CYP, LOX-AA | ( $\pm$ )18-HETE                 | 41                       | (32 - 61)     | 41           | (22 - 50)     | 22                               | (9 - 22)      | 24           | (10 - 43)     |
| LOX-EPA     | 12(S)-HEPE                       | n.d.                     |               | n.d.         |               | 142                              | (138 - 145)   | 140          | (139 - 148)   |
| CYP-AA      | 17(S)-HETE                       | 154                      | (152 - 156)   | 152          | (152 - 153)   | 151                              | (151 - 151)   | 152          | (151 - 152)   |
| LOX-EPA     | 5(S)-HEPE                        | 189                      | (188 - 194)   | 186*         | (185 - 187)   | 194                              | (191 - 203)   | 192          | (187 - 192)   |
| CYP, LOX-LA | ( $\pm$ )13-HODE                 | 176                      | (47 - 885)    | 153          | (90 - 216)    | 284                              | (120 - 615)   | 214          | (59 - 345)    |
| LOX-LA      | ( $\pm$ )9-HODE                  | 234                      | (104 - 805)   | 72           | (27 - 107)    | 231                              | (72 - 428)    | 156          | (59 - 204)    |
| LOX, CYP-AA | 15(S)-HETE                       | 75                       | (57 - 91)     | 34*          | (30 - 46)     | 88                               | (35 - 165)    | 48*          | (17 - 85)     |
| CYP, COX-AA | 11-HETE                          | 166                      | (89 - 232)    | 39*          | (31 - 58)     | 101                              | (39 - 203)    | 28*          | (10 - 61)     |
| CYP, LOX-AA | 8(S)-HETE                        | 280                      | (244 - 303)   | 254          | (230 - 267)   | 327                              | (267 - 407)   | 298          | (222 - 393)   |
| CYP, LOX-AA | 12-HETE                          | 15                       | (10 - 20)     | 19           | (13 - 28)     | 72                               | (15 - 103)    | 51           | (8 - 107)     |
| LOX-AA      | 12-oxo-ETE                       | 212                      | (210 - 213)   | 212          | (210 - 212)   | 215                              | (211 - 220)   | 212          | (212 - 216)   |
| CYP, LOX-AA | 5-HETE                           | 40                       | (36 - 93)     | 18*          | (13 - 33)     | 942                              | (519 - 1292)  | 613*         | (257 - 929)   |
| CYP-AA      | ( $\pm$ )14,15-EET               | 135                      | (133 - 136)   | n.d.         |               | 135                              | (134 - 136)   | n.d.         |               |
| LOX-AA      | 5-oxo-ETE                        | 295                      | (293 - 304)   | n.d.         |               | 308                              | (300 - 316)   | 305          | (291 - 315)   |
| CYP-AA      | ( $\pm$ )8,9-EET                 | 509                      | (504 - 517)   | 500          | (499 - 505)   | 502                              | (497 - 503)   | 498          | (496 - 499)   |

n.d., not detected; presence vs. absence of Atglistatin, \*p < 0.05
